# Supplementary material
Source: PubMed Central journal article supplement (PMC2950063)

**Supplemental Figure Legends**

**Figure S1.** RIN1 expression in mammary cell lines. **A.** Immunohistochemical staining for RIN1 in cell lines. Paraffin-embedded MCF10A and KPL-1 cells were sectioned and stained with anti-RIN1 using the same technique applied to tissue samples (Figs. 1B & 1C). **B.** Expression of RIN1 in normal mammary epithelial cells. RIN1 was immunoprecipitated from HMLE (immortalized primary human mammary epithelial cells) and from MCF10A cells, then analyzed by immunoblot with anti-RIN1. Three percent of each cell extract used in the immunoprecipitations was immunoblotted directly with anti- $\beta$ -tubulin (TUBB) for normalization.

**Figure S2.** Alignment of RIN1 promoter sequences from human (*H. sapiens*), monkey (*M. mulatta*), cow (*B. taurus*), dog (*C. familiaris*), rat (*R. norvegicus*) and mouse (*M. musculus*). Nucleotide -809 is the first nucleotide following the transcription stop of the upstream gene *BRMS1*. Nucleotide +1 is the transcription start of RIN1 and nucleotide +128 is the translation start of RIN1. Nucleotide sequences were obtained from ENSEMBL ([www.ensembl.org](http://www.ensembl.org)) and SNAI1 sites were identified using CONSITE ([mordor.cgb.ki.se/cgi-bin/CONSITE/consite](http://mordor.cgb.ki.se/cgi-bin/CONSITE/consite)). Human SNAI1 sites are underlined. Conserved SNAI1 sites (no more than one nucleotide variation in one species) are in bold.

**Figure S3.** Ectopic expression of RIN1 in breast tumor cells. **A.** Comparison of endogenous and ectopic RIN1 expression in KPL-1 (left) and MDA-MB-231 cells (right). MCF10A cells show normal mammary epithelial cell expression of RIN1 (third lane on left, second lane on right), and

a  $\beta$ -tubulin (TUBB) control blot is shown below. **B.** RIN1 expression in tumors derived from transduced KPL-1 cells. RIN1 immunohistochemical staining of tumors obtained from KPL-1 blast transduced cells or KPL-1 RIN1 transduced cells injected into nude mouse mammary fat pads (Fig. 5).

**Figure S4.** **A.** Expression of wild type RIN1 and RIN1<sup>QM</sup> constructs in transduced MDA-MB-231 cells. **B.** Silencing of endogenous RIN1 expression in MDA-MB-231 cells by shRNA. Note that the amount of extract and exposure used for vector control MDA-MB-231 cells was increased compared with “A” to highlight the silencing of RIN1. **C.** Analysis of RIN1<sup>QM</sup>, a signaling defective mutant of RIN1. RIN1<sup>QM</sup> mutant is defective for ABL2 (Arg) activation. HEK293T cells were transfected with Flag-ABL2, RIN1 and RIN1<sup>QM</sup> constructs as indicated. Whole cell lysates (50  $\mu$ g) were immunoblotted with anti-pTyr (left). Endogenous CRKL, a known ABL substrate, was immuno-precipitated with anti-CRKL and immunoblotted with anti-p-Tyr (right, top). Whole cell lysates were immunoblotted with anti-CRKL, anti-Flag (ABL2) and anti-RIN1 to validate expression.

**Fig. S1**  
**Milstein et al.**

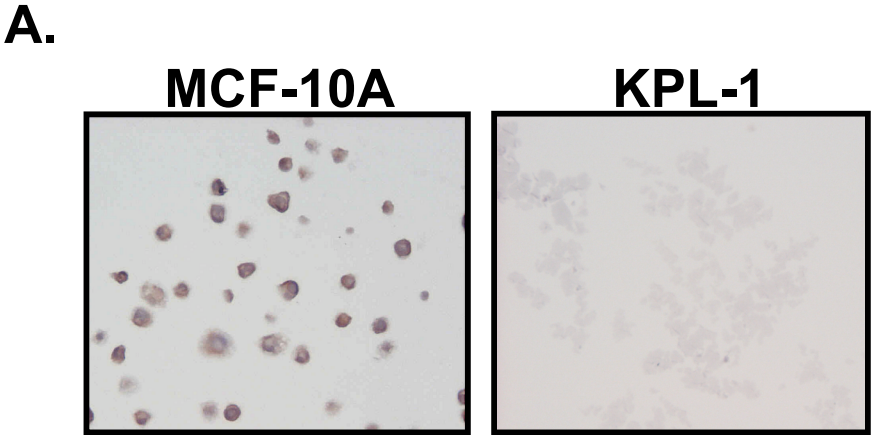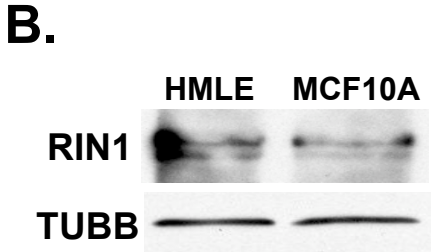

Fig. S2

Alignment of mammalian RIN1 promoters

-809

H. sapiens CTCTGGCGTGCCCTGTGTGTGTGTGTGATTTACCTTGCAAGAGAATCAGGGCTCCCCTGGGGA
M. mulatta TTCTGGTGTGCCCGTGTATGTGTG--ATTTACCTTGCAAGAGAATCAGGGCTTCTGTGGGGA
B. taurus CTCTGGCATGACCCGCTGTGTCTA--ATTTACCGTGAAGGGAATCAGGACTCTGGTGGAAA
C. familiaris CCCTAGCATGACCTGTGTGTGTCTG--ATTTACTTTGCGAGGGAATCAGGGCTCCCCTGGGGA
R. novogicus CCTGGATATGACTGCTGTGTGGTTG--TTGTATCTTACAAGGGAATCAAGGCTTTTGTGGGGA
M. musculus CCTTGGTGTGGCTGATGTGTGGCTG--CTGTATCTTAAAAGGGAATCAAGGCTTT--GTGGG-A
\*\* \* \* \*\* \* \*\* \* \*\* \* \*\* \* \*\* \* \*\* \*

Hs GCACCTGAACCAGGCCGACTTCTAGGGTGCCTGCAG---ATTGCCACTCCTCACACTACCCAGCAGAGGCTAGAGCACTG
Mmul GCACCTGAACCAGGCTGACTTCTGAGGTGCCTGCAG---ATTGCCACTCCTTGCACTGCCAGCAGAGGCTGGAGCACTG
Bt GTGCTTGAGACAGGCAGTCTCTTCTGGGGGCCCTGG-----TATCTCCTCCAG-----TGAGTGGAGCCTACCCCTTA
Cf GTGCTTGAGTCAGGTGGGCTCTCCTGGAGTCCCTGG-----TACCTCCTCTCTCTACCTGGCAGGAGCCACCTACTC
Rn GCACCTAAGACA----GACTT--CTGGGTCCCTA-----CAGTTTGAGACA-----TTA
Mmus GCACCTAAGACA----GACTTGTCTGGGGTCCCTG-----TAGTTTGTGAC-----
\* \* \* \* \* \* \* \* \* \* \*

Hs TG-CGTGGGGC-CAGGCTGGG---GAGGG-----GGAGGTGGGGCGCTGGGCTGC-----CT
Mmul TG-CGTGGGGC-CACACTGGG---GAGGG-----GGAGGTGGGGCGCTGGGCTGC-----CT
Bt TGACTTGGGGTATAGGCTGGGGAAGGAGGCATTCACACACATCTGCTCCAGATGTGGGGGCTGGG-----TGCT
Cf TGAGTTGGGGTATGGG--GGGGG-----CCTCCAGCACACCT--CCAGAGTGGGGGA-----
Rn GTTCTTAGAGAAAAGCCTGAGGAAGGAAGT-----TGGGACCAGGGCAGG-----
Mmus -----TTAGAGAAAAGCCTGGGAGAGGAAGT-----TGGGACCAGAGCAGGAAGCGCCG-----
\* \* \* \* \* \* \* \* \* \*

Hs GGCGC-----TGGGCAGAGTCAACATAT-GGCACCAGGAGAGTGCCTCGG-C-----GGGGAGGGTGGATGCG
Mmul GGCAC-----TGGGCAGAG--AACATAT-GGCAGCAGCGGAGTGCCTCGGGT-----GGGGAGGATGGGTGCG
Bt GGTGA-GC--AAAGTCTGAGGCAACTT--GGGGCACAGGCCGAGCACGTGGC-----CTGGGTGCT
Cf -GTGA-GC--AAAGTCTGAAGCAACAT---GTGGCACAGGCCGATCATGTGTCG---GGGGTGGGGAGGGTGTGTGCT
Rn -----CAAACAGTCGAAGCAC---GTGGCCTCGGGTGGGGAAGGGGC-----TTCTGCAC-
Mmus -ATGGCACAGGCAAGCCAGAGAAGCAC---ATGGCCTTGTGTGGTGAAGGGAC-----TTTGGAC-
\* \* \* \* \* \* \* \* \* \*

Hs -TGTGCTTGGAGCCTGGGTCAATGCTG**CACCTG**TCCCAGTTGCCAGATTGGCAAGGCAGGCTGGCAGA--GCCTGC
Mmul -TGTGCTTGAAGCCTGGGTCAATGCTG**CACCTG**TCCCAGTTGCCAGATTGGCAAGGCAGGCTGGCAGA--GCCTGC
Bt CCGTGCCTAGAGACTGGATCGTGTCTG**CACCTG**CCCCAGTCTCTTGGCAGATTGGCAAGGCAGGCTGT-----
Cf CTGTGCTTGGAGCCTGGGTCAATGCTG**CACCTG**CCCCAGTCACTTGGCAGATTGGTAAGGCAGGCTGGCGGG--GCCTGG
Rn --ATTTCTGGAGTCAAGTCAATGCTG**CACCTG**CCCCAACACTTGGCAAATTGGCAAAGCGGGCTAGCTAGCAGGGTCT
Mmus --ATGCCTGGAGGCCAGGTCAATGCTG**CACCTG**CCCCAGACACTCGGCAGATTGGCAAGGCAGGCTAGCTAGCAGGGCCT
\* \* \* \* \* \* \* \* \* \*

Hs GTGCGTGGGAGGCAGCCGGCAGCACCCGCATGTGCTGACGACCTCACAGCCAGACTCCCC-----TGGTTA-GC
Mmul ATGCGTAGGAGGCAGCCGGCAGCAGCACCATGTGCTAACGACCTCACAGCCAGACTCCCC-----TGGTTA-GT
Bt GTGCGTGGGAGGCAGCCAGCAGCAGCGCCGCTGTGCGGATGACCTCACAGCCAGACTCCCC-----CTGTTA-GT
Cf GAGTGTAGGAGGCAGCTGGCAGCAGCACCATGTGCTGACGACCTCACAAACAACTCCCCACCCCATCCCATTTA-GC
Rn GTGTGTGGGAGACAGCTAGCAGCAGCACCATGTGCTGTCGACCTCACAGCCACACGCCCC-----TCTGTTA-GC
Mmus GTGTGTGGGAGGCAGCTAGCAGCAGCACAAGTGTGTCGACCTCACAGCCACACTCCCC-----TCTGGTTA-AC
\* \* \* \* \* \* \* \* \* \*

Hs ACTGAGTGTGAGAACCACCCCCAGAACCCTCAGTTAAGCAAATAGGTTGGTTTCCATGGAGACATGGCATAATTTCTCCAT
Mmul GCTGAGTGTGAGAACCACCCCCAGAACCCTCAGTTAAGCAAATAGGTTGGTTTCCATGGAGACATGGCATAATTTCTCCAT
Bt GCTGAGTGTGAGAACCACCCCCAGAACCCTCAGTTAAGCAAAGGGTTAGTTTCCATGGAGACACAGCATCCTTTCTCCAT
Cf GCCAAGTGTGAGAACCACCCCCAGAACCCTCAGTTAAGCAAAGGGTTAGTTTCCAAGGAGACACAGCATCCTTTCTCCAT
Rn AGTGAGTGTGAGAACCACCCCCAGAACCCTCAGTTAAGCAAAGAGCTTAGTTTCCATGGAGACACAGCATCCTTTCTCCAT
Mmus AGTGAGTGTGAGAACCACCCCCAGAACCCTCAGTTAAGCAAAGAGCTTAGTTTCCATGGAGACACAGCATCCTTTCTCCAT
\*\*\*\*\* \*\*\*\*\* \* \* \* \* \* \* \* \* \* \*

Hs GGCAACCTAAAATCCTAAAACCCAGGTT-----CAGGAATGAGTCATCTATGGACAGTAGAGGGTGTCTCCCACAAGGC
Mmul GGCAACCTAAAATCCTAAAACCCATGTT-----CAGGAATGAGTCATCTATGGACAGTAGAGGGTGTCTCCCACAAGGC
Bt GGCAACCTGAAATCCCAAAACCCAGTTAAGCTCAGGCATGAGTCATCTGTGGCCAGTAGGGGGCACTCACCAAAAGGC
Cf GGCAACCTGAAATCCAAACCCAAAGTTCAGGCTCGAGATGAGTCATCTGTGACCAGTAGGGGGTGCCTCCCACTGGGC
Rn AGCAACCTGAAATCACAAAACCCAAAGTTAGATTAGGAAATGAGTCATCTGCAACCAGTAGGGGGTGTCTCCCACAAGGC
Mmus AGCAACCTGAAATCACAAAACCCAAAGTTAGGTTAGGAAATGAGTCATCTGCAACCAGTAGGGGGTGTCTCCCACAAGGC
\*\*\*\*\* \* \* \* \* \* \* \* \* \*

Fig. S2

```

Hs      TGACCTGAGG-----CCAGGGG---CAGATGAGCAACTGACCACAGAGCC----AAAGGTGCC
Mmul    TGACCTGAGG-----CCAGGGG---CAGATGAGCAACTGACCACAGAGCC----AGAGGTGCC
Bt      TGACCTTAGG-----GCCAGGGA---CAGATGAGCAGTTGACCACAGACTT----GAAGGTGCC
Cf      TGACGGGGGGCG-----GGGAGGGCACACAAATGAGCAGTTGACCACAAACTTAATTAAGGTGCC
Rn      TGACC-----CCGCCTTC-----AAGGCTGGAACAGATGAGCCAGTGACCACAGACTT-CTT-AAAGGTGACC
Mmus    TGACCTTCCCCCCCCCCCCGCCCCCCTTTGCAAGGCTGGAGCCGATGAGCCAGTGACCACAGACTT-CTT-AAAGGTGACC
      ****                      *      *      *      *      *      *      *      *      *      *

```

```

Hs      CCAGAGCATGGCTGGGGCCTGTGGGGACTGAGGCCG-----CTTAACCACTTCCCGCCACAGTGTGCAATGTGAGTAG-
Mmul    CCAGAGTGTGGCTGGGGCCTGTGGGGACTGAGTCCG---CCGTTAACCACTTCCCGCCACCTGTGCAATTTGAGGAG-
Bt      CAAGGGCG-A-----GGCCGTGGAGACCTTGGCGGGCACAGCTTAACCCCTTCCGTGCCACTGTGCGTTTTGAGGAGT
Cf      CATGGGCA-AACTTGGGCTGTGG-GACCAGATGGGGCCAGCTTAACCCCTTCCCGCCTGCTCGTGTGCCTCGAGGAGG
Rn      CAGGGGTGCGGCTTGGGCTGTGGGAACCTT-GGTTGGCCGTGTTTAACCCCTCCCTATCCCACATGATAGTGTGAGG---
Mmus    CAGGGGTGTGGCTTGGGTCTATGGGAACCTT-GGCTGATCCAGCCTAACCCCTCCCTCCCCACTGCCATAGTGTGAGG---
      * * *             * * * * * * *      *      *      *      *      *      *      *      *

```

```

Hs      CTGGTGAGGCTGCAGGAGGCCGTGTGTGGAGGTGGCATCCCC-CAGCTGGGGCCCTCAGAGCAGGGCTAGCATGGAGGGG
Mmul    CTGGTGAGGCTGCAGGAGGCCCTGTGTGGAGGTGGCACC---CAGCTGGGGCCCTCAGAGCAGGGCTAGCACGGAGGGG
Bt      CTGGCAAGGCTGCAGGAAGCGCGGTGTGGAGGTGGCAGCCCCACAGCTAGAACCTGGGCAGGCCACCTGCATGGAAATGG
Cf      CTGGCAGGCTTCAGGATGCGCTGTGTGGAGGTGGCAGCCCCACAGCCGGGGCTCGTGGAGTGGCAC-TGCACGGAGAGG
Rn      -----AGGCTACAGGAAGTGTGTGTGGAGGTGTCCTCCACAGCGGGGGCCCTGATA--GACTCTAGTGTGGAAG--
Mmus    -----AGGCTGCAGGAGGTGTGTGTGGGGGTGTCCTCCCTTAGCCGGGGC-CTGATGATGACACTGGCATGGAGGGG
      ***** ***** *      ***** *      *      *      *      *      *      *      *

```

+1

```

Hs      ACCCCTGACCCCCAAAGCAGGGTCCAGA-ACAGAGGAGGCGGGCACTGGCCAGGCAGGGTGGACACACAAGAGTTAACTG
Mmul    ATCCCTGACCCCCGAAGCAGGGTCCAGA-ACAGAGGAGGCAAGCACTGGCCAGGCAGGGTGGACACACAAGAGTTAACTG
Bt      ATCCCTGCCCCCAGAGGCTGGGCCAGAG-GCAGAGGAAGCAGGCACTGCCCGGGCTGAGTGGACACAAAAGAGTTAACTG
Cf      ACCCTTGTCTCCCTGAGGCTGGGCCTGAACACGGAGGAAGCGGGCACTGCCCGGGCTAAGGGGACACACAAGAGTTAACTG
Rn      -CCTCTGCCATTCAGACTGGGCCAAGA-GCAAAAAGAGTGGACTGGCTACATGGAGTGGACATAACAAGAGTTAACTG
Mmus    TTCTCTGCCATTCAGACTGT-CTAAGA-GTAGAAGAAGTGGACTGGCTACATGGAGTGGACATAACAAGAGTTAACTG
      * **             * * *      *      * * * * *      *      *      *      *      *

```

```

Hs      GCGGG-TGTGACAGG-CGGAC-----CGCCCTCAGGAAGTGTACTCAC---TGGGGATGTGC-GTGC-CTTGCCTTGG
Mmul    GCGGG-TGTGACAGG-CGGAC-----CGCCCTCAGGAAGTGTACTCAC---TGGGGATGTGC-GTGC-CTTGCCTTGG
Bt      GCGGG-TGTGACCGGGCGAAC-----CGCCCTCAGGAAGTGTACTCACCACTGGGAATGTGA-GTGCTCTCGCCTTGG
Cf      GCGGGGCGTGACAGGGCGAAC-----CGCCCTCAGGAAGTGTACTCACTGCTGGGAATGTGA-GCGCTCTTGCCTTGG
Rn      GCGGGGTGTGACCGGGCGAAC-----CGCCTTTCAGGAAGTGTACTCACCGCCAGGAATGTGC-ACGCTGTGCCTTGG
Mmus    GCGGGGTGTGACAGGGCGAAC-----CGC-TTCAGGAAGTGTACTCACCGCCAGGAATGTGC-ACGCTGTGCCTTGG
      ***** ***** * * *      * *      ***** *      *      *      *      *

```

+128

```

Hs      GA-CTGGATTCTCT-----TCCTGAAGC-GAA-----GGAGCTCCCAGCCATGGAAAGCCCTGGAGAGT
Mmul    GG-TTGGATTCTCT-----TCCTGAAGCCGAA-----GGAGCTCCCAGCCATGGAAAGCCCTGGAGAGT
Bt      GGGCTGGCTTCTCT----GAGTCCCGGAGAGACTGG-----AGGAGCTCCCAGCCATGGATACCCCCGGGAGC
Cf      GGGCTGGATTCTCTTCTCTGAGTCCCTGGGAGAAAACCGGAGAAAACAAAGGAGCTCCCAGCCATGGAAACCCCTGGGGAGC
Rn      GGGTTGGATTCTCTTCTCTGAGTCCCAGGAGAAGCTGA-----AGGAGCTCCCAGCCATGGAAAGCCCTGGGTGAGA
Mmus    GGGTTGGATTGTCTTCTCTGAGTCCCAGGAGAAGCCGA-----AGGAGCTCCCAGCCATGGAAAGCCCTGGGTGAGA
      *      *** * * *      *      *      ***** *      *      *      *

```

Fig. S3  
Milstein et al.

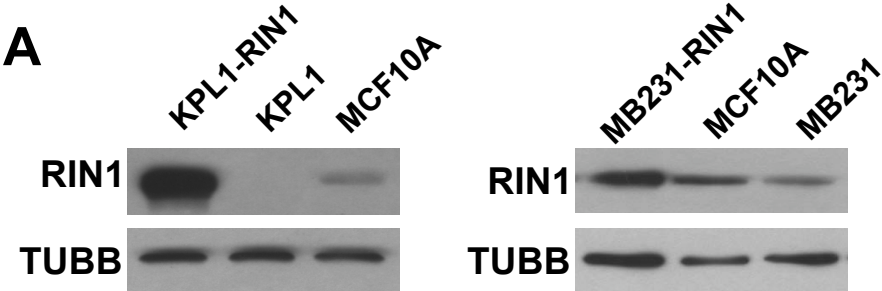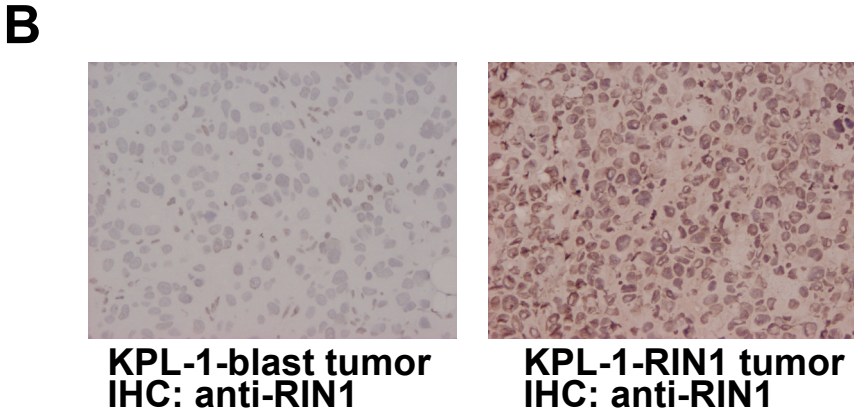

**Fig. S4**  
**Milstein et al.**

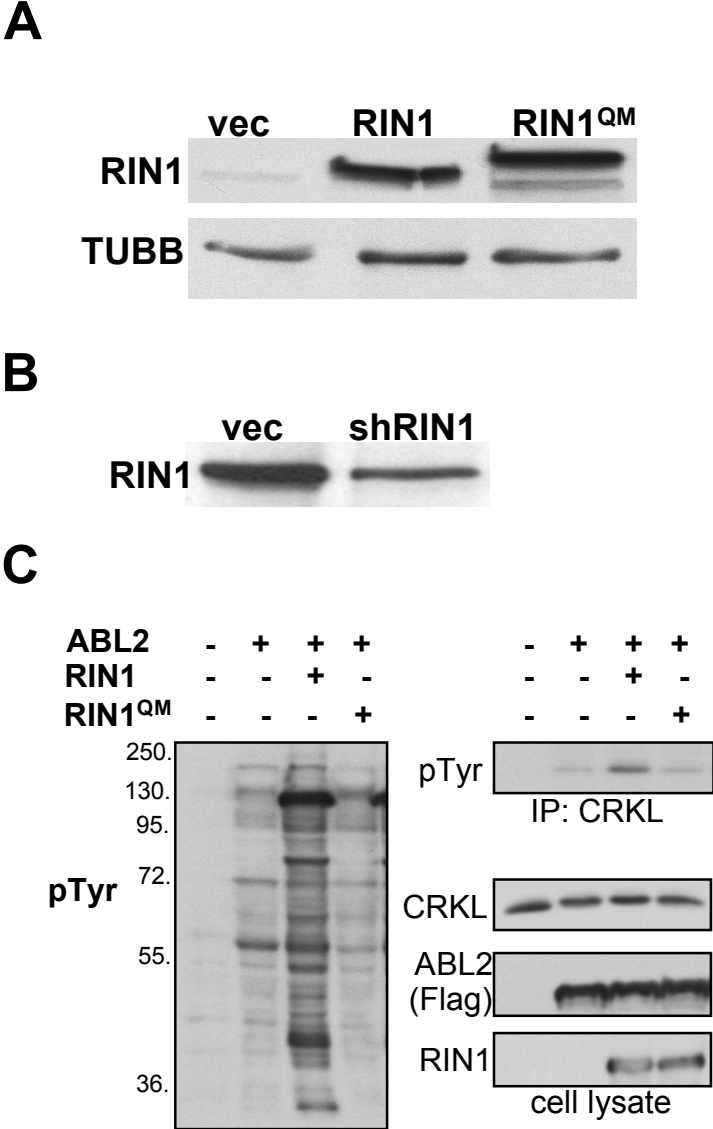

Supplement: NIHMS235516-supplement-Supplemental.pdf [file NIHMS235516-supplement-Supplemental.pdf]
